# Supplementary material for: Guidelines to Facilitate Human-Wildlife Interactions in Conservation Translocations
Source: Frontiers journal article supplement (doi:10.3389/fcosc.2022.788520), 2022-02-15
Supplement: Data_Sheet_1.PDF [file Data_Sheet_1.PDF]

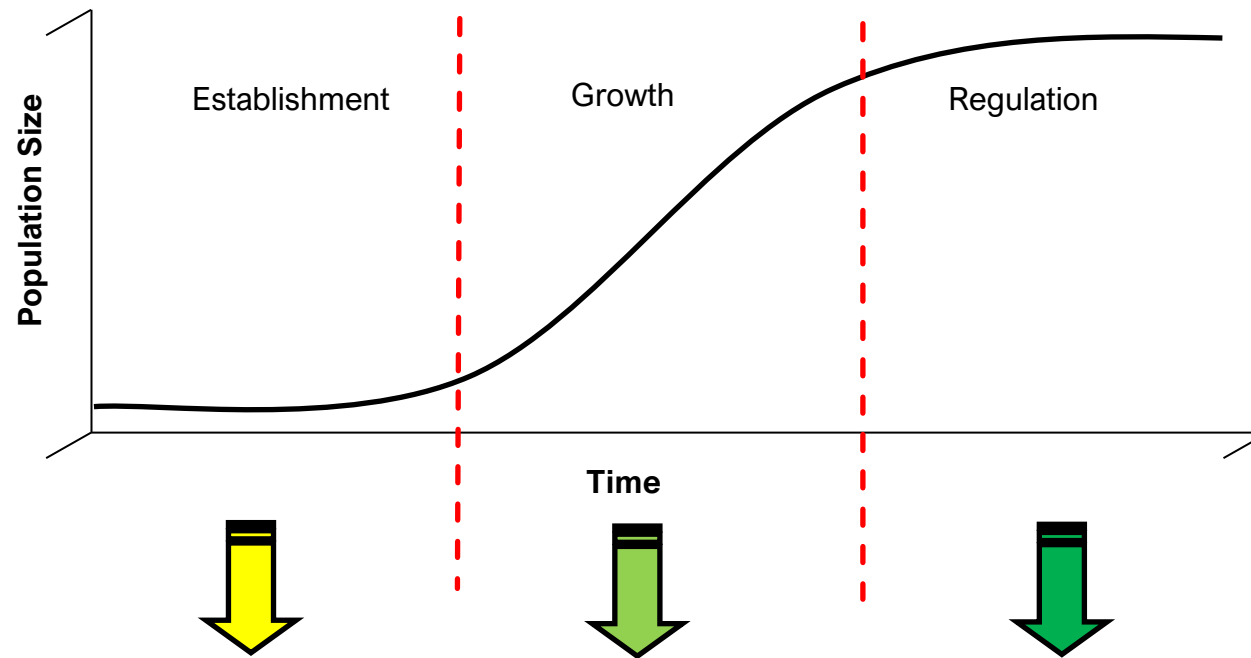

|                            |                                                           |                                                           |                                                    |
|----------------------------|-----------------------------------------------------------|-----------------------------------------------------------|----------------------------------------------------|
| Exit Strategy (main tasks) | Hand-off to new steward (build capacity, ease transition) | Hand-off to new steward (build capacity, ease transition) | Success (Share data and learning, end obligations) |
|                            | Failure (share learning, mitigate damages)                | Voluntary Cessation (mitigate damage to Network)          | Voluntary Cessation (maintain network)             |
|                            | Cessation (mitigate damage to Network)                    | Success (share data and learning, maintain network)       | Hand-off (to watchdog, new conservation steward)   |
