# Supplementary figures and images for: Guidelines to Facilitate Human-Wildlife Interactions in Conservation Translocations
Source: Frontiers journal article supplement (doi:10.3389/fcosc.2022.788520), 2022-02-15

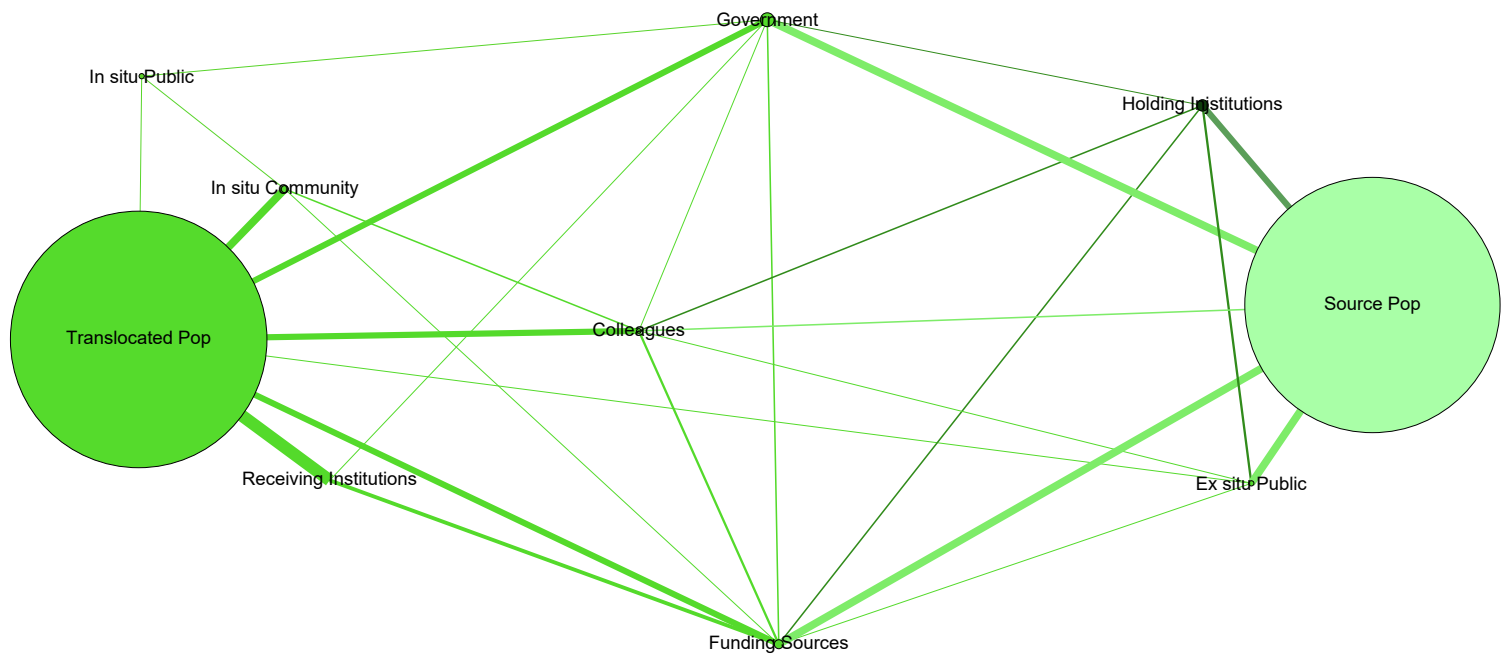

Supplement: Data_Sheet_2.PDF [file Data_Sheet_2.PDF]
